# Supplementary material for: Biosynthesis of plant-specific alkaloids tetrahydroprotoberberines in engineered Escherichia coli
Source: Royal Society of Chemistry journal article supplement (doi:10.1039/d1gc01670a), 2021-01-01
Supplement: d1gc01670a1.pdf [file d1gc01670a1.pdf]

### Supporting Information 1

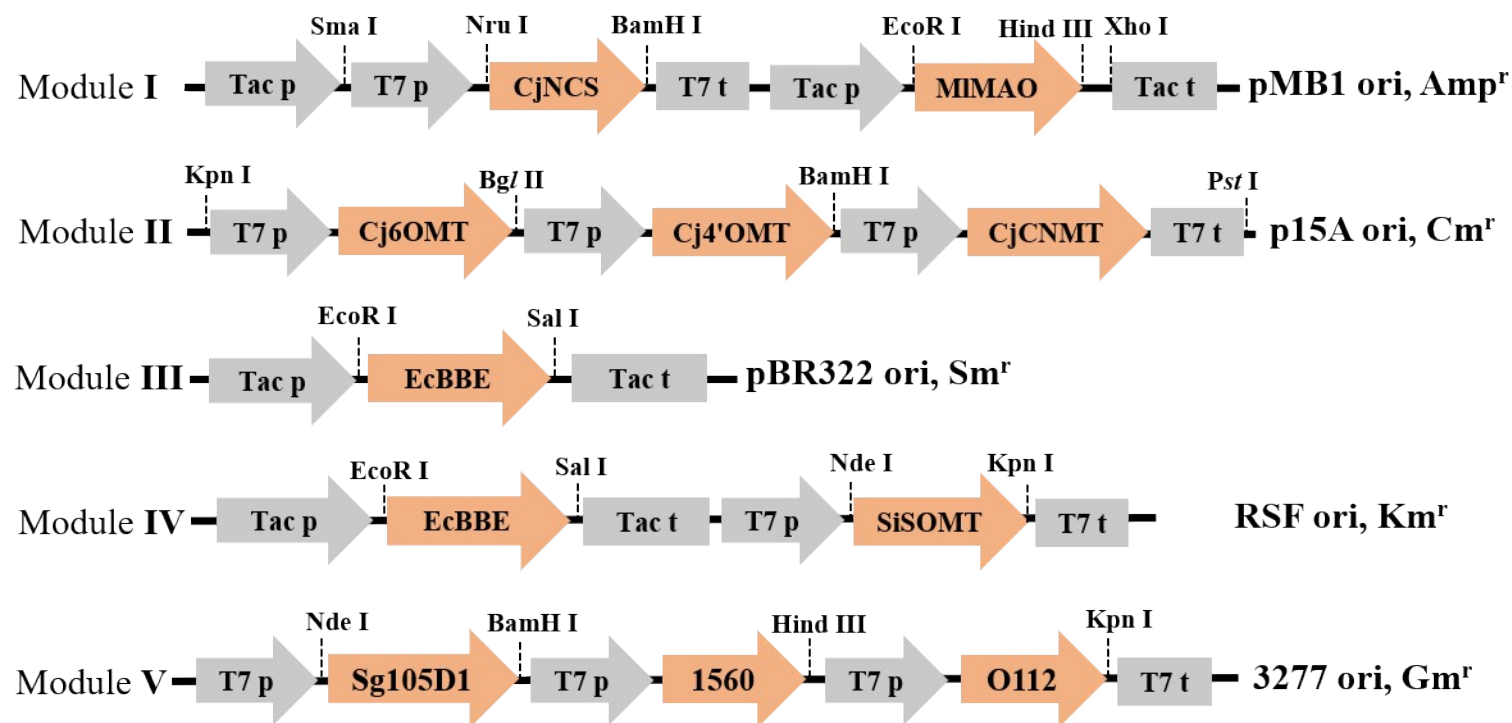

Fig. S 1. Schematic diagram of strain constructs.

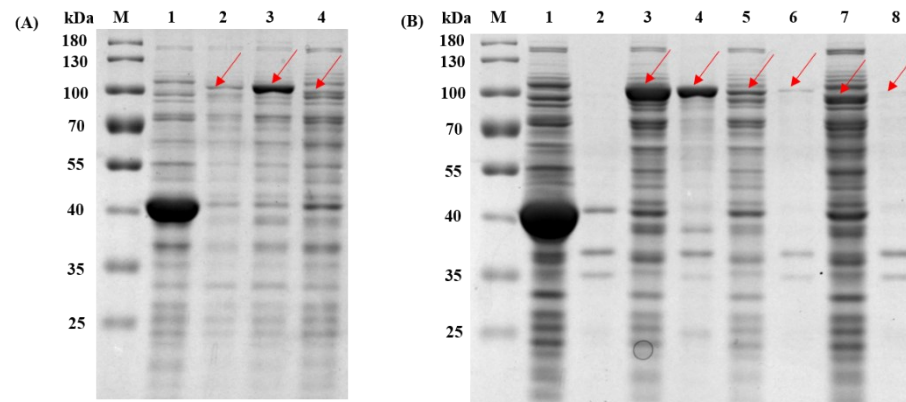

Fig. S 2. BBE protein expression from different sources in *E. coli*. (A) Whole-cell, M: marker; Lane 1: pMAL-c4x (vector control); Lane 2: SiBBE; Lane 3: EcBBE, and Lane 4: PsBBE. Soluble and insoluble. (B) M: marker; Lane 1: the supernatant of pMAL-c4x (vector control); Lane 2: the pellet of pMAL-4x (vector control); Lane 3: the supernatant of EcBBE; Lane 4: the pellet of EcBBE; Lane 5: the supernatant of SiBBE; Lane 6: the pellet of SiBBE; Lane 7: the supernatant of PsBBE, and Lane 8: the pellet of PsBBE.

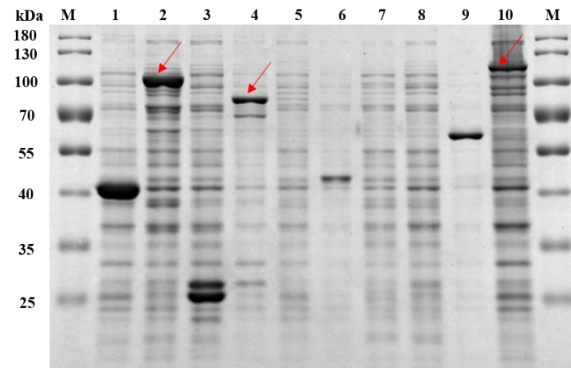

Fig. S 3. BBE protein expression with different tags in *E. coli* (whole cell). M: marker; Lane 1: pMAL-c4x (control; MBP  $\approx$  40 kDa); Lane 2: M-EcBBE; Lane 3: pGEX6p-1 (control; GST  $\approx$  26 kDa); Lane 4: 6P-EcBBE; Lane 5: pACYCDuet-1(control); Lane 6: CYC-EcBBE; Lane 7: pQE30 (control); Lane 8: 30-EcBBE; Lane 9: pCold TF (control, Trigger Factor  $\approx$  58 kDa) and Lane 10: TF-EcBBE.

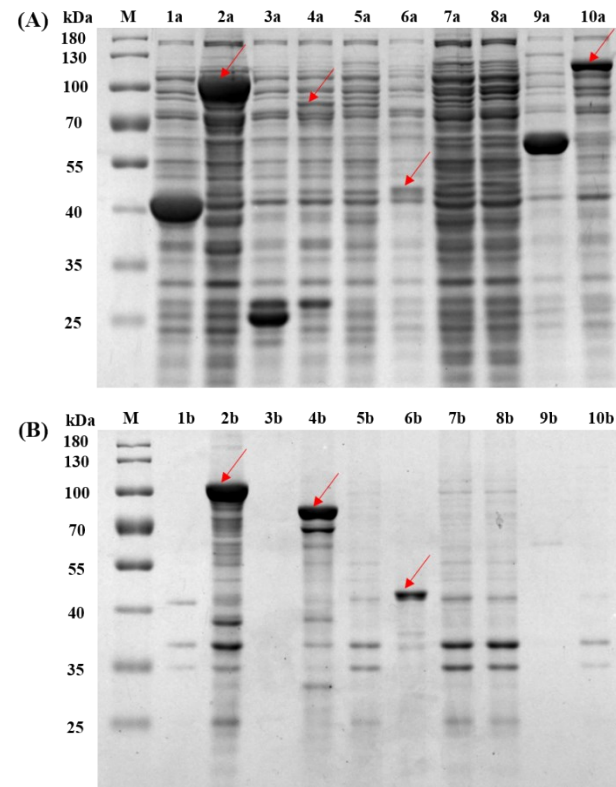

Fig. S 4. BBE protein expression with different tags in *E. coli* (soluble and insoluble). M: marker; Lane 1a: the supernatant of pMAL-c4x; Lane 1b: the pellet of pMAL-c4x; Lane 2a: the supernatant of M-EcBBE; Lane 2b: the pellet of M-EcBBE; Lane 3a: the supernatant of pGEX6p-1; Lane 3a: the pellet of pGEX6p-1; Lane 4a: the supernatant of 6P-EcBBE; Lane 4b: the pellet of 6P-EcBBE; Lane 5a: the supernatant of pACYCDuet-1; Lane 5b: the pellet of pACYCDuet-1; Lane 6a: the supernatant of CYC-EcBBE; Lane 6b: the pellet of CYC-EcBBE; Lane 7a: the supernatant of pQE30; Lane 7b: pellet of pQE30; Lane 8a: the supernatant of 30-EcBBE; Lane 8b:

the pellet of 30-EcBBE; Lane 9a: the supernatant of pCold TF; Lane 9b: the pellet of pCold TF; Lane 10a: the supernatant of TF-EcBBE and Lane 10b: the pellet of TF-EcBBE.

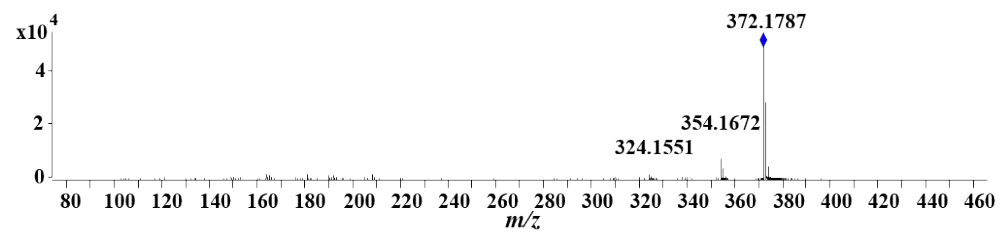

Fig. S 5. HPLC-Q-TOF-MS/MS identification of the 15.7 min peak from the strain BL21-105D1-1-1.

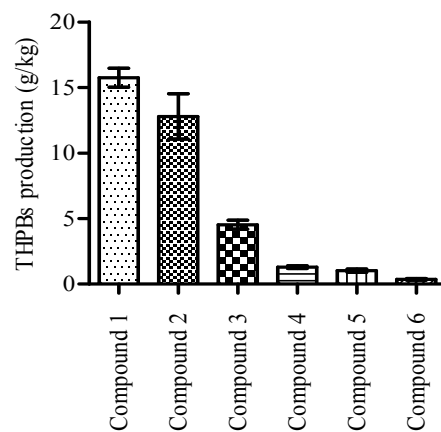

Fig. S 6. The dry cell weight yield of THPBs from *E. coli*.



Table S1. Analysis of BBE protein expression and activity.

| Various sources / various plasmids | Total protein (volume) | Soluble (%) | Insoluble (%) | Conversion rate (%) |
|------------------------------------|------------------------|-------------|---------------|---------------------|
| M-EcBBE (before optimization)      | 53255760               | 58.94       | 41.06         | 32.75               |
| M-SiBBE                            | 9451860                | 74.95       | 25.05         | 1.38                |
| M-PsBBE                            | 8718960                | 85.38       | 14.62         | 3.47                |
| M-EcBBE(after optimization)        | 87142172               | 42.34       | 57.66         | 78.90               |
| 6P-EcBBE                           | 43219253               | 12.24       | 87.76         | 18.65               |
| CYC-EcBBE                          | 3929686                | 69.93       | 30.07         | 1.09                |
| 30-EcBBE                           | 1019925                | 28.89       | 71.11         | 1.52                |
| TF-EcBBE                           | 25361490               | 82.00       | 18.00         | 1.93                |

Table S 2. HPLC-DAD-Q-TOF MS data for the reaction products.

| Compounds | t <sub>R</sub> (min) | Molecular Formula                               | [M+H] <sup>+</sup> | Error (ppm) | Fragment Ions                          | Identification            |
|-----------|----------------------|-------------------------------------------------|--------------------|-------------|----------------------------------------|---------------------------|
| Substrate | 3.15                 | C <sub>8</sub> H <sub>11</sub> NO <sub>2</sub>  | 154.0857           | 3.63        | 137.0594, 119.0488, 109.0643           | dopamine                  |
| product 1 | 9.17                 | C <sub>16</sub> H <sub>17</sub> NO <sub>4</sub> | 288.1240           | -3.36       | 164.0704, 143.0491, 123.0440, 115.0542 | (S)-norlaudanosoline      |
| product 2 | 13.88                | C <sub>19</sub> H <sub>23</sub> NO <sub>4</sub> | 330.1705           | -1.60       | 239.1068, 207.0807, 192.1019, 137.0593 | (S)-reticuline            |
| product 3 | 15.23                | C <sub>19</sub> H <sub>21</sub> NO <sub>4</sub> | 328.1555           | -3.56       | 296.1227, 178.0861, 163.0622, 151.0737 | (S)-scoulerine            |
| product 4 | 17.91                | C <sub>20</sub> H <sub>23</sub> NO <sub>4</sub> | 342.1691           | 2.59        | 178.0852, 165.0901, 107.0476           | (S)-tetrahydrocolumbamine |
| product 5 | 19.30                | C <sub>21</sub> H <sub>25</sub> NO <sub>4</sub> | 356.1856           | 0.10        | 192.1019, 165.0910, 131.0727           | (S)-tetrahydropalmatine   |
| product 6 | 17.05                | C <sub>20</sub> H <sub>23</sub> NO <sub>4</sub> | 342.1686           | 4.06        | 192.1007, 165.0898                     | (S)-corydalmine           |

Table. S 3 Effects of substrate on the growth of *E. coli*.

| Compound 5 (mg/mL) | cfu ( $\times 10^6$ ) |
|--------------------|-----------------------|
| 0                  | 162                   |
| 0.1                | 154                   |
| 0.2                | 148                   |
| 0.5                | 132                   |
| 1                  | 117                   |
| 2                  | 96                    |
| 3                  | 54                    |
| 4                  | 31                    |



**Supporting Information 2. Nucleotide sequences of enzymes involved in alkaloids biosynthesis.**

SiSOMT 1050bp

GAAGGTGCCAACTTCCTAGCAGGCCTTGGAAGTCTAGGCCGGCTGATATGCATTCCCATGGCATTGAAAGCAGCACTAGACCTCCAAGTTTTCGAGA  
TCATAGCCTCGGCGGGGGCGGGATCGCACCTCTCCGCATCGGAGATCGCGTCGAGGATCCAAACCACCAATCCTAACGCCGCTACCGCCCTCGACCG  
GATTCTCCGAATGCTTGCCGCAGCGTCTCTCCTTTCGGTCACCACAAGGCCTAATCATTCCACGTCCGAAAGGGCGTACGGGCTCACGCCGGAGACC  
CTATCCTTGGTGCCTAACAAGGAGGGAGTGTCCGCCGCGGCCATGATGAGGTTAGTGACCGATGAGGCCGTTATTAAGAGCTTTTGTGGGTTGAAGC  
ATGCAGTGGTTGAAGAAGGGTGCCTGCGTTCGATAAGTTGCACGGCGAGAACTTCTTCAAGTACGCCGCGAAGGAGTCGAGGGTGAACCAGGTGT  
TTAATGAGGCCATGGCTGCTGGGTCTGCCATTGCCTTTGAGGAGGTCTTTAAGGTTTATGAGGGGTTTAAGGAGTTAGGGAGTTGGTTGATGTTGG  
GGGAGGGGTTGGGACCTCCCTTGGTAGAATTGTGGGCAGATATCCCATATTAAGTGGGATCAATTTGAGCTGAGCCATGTTATTGATGGTGCACCA  
ACTTATCCAGGGATGAAGCATGTTGCAGGAGATATGTTTGAAGGCATCCCTAATGCACAAACCATCATGCTTAAGTGGGTGCTTCACGACTGGGGT  
ATGAGTACTGTGAGAAGATACTGAAGAAGCTTTGCCTGGAGAAGGTGGGAAGGTGATAGTAGTTGAGTTTGTGCTTCCTGAGGAGC  
TCGAAACAACGCCGAGACCTTCAACGCCTTGATTCCTGATCTCCTCATGATGAGCTTGAATCCAGGAGGAAAAGAGAGGACTCTTGCCAGTATGA  
AGATCTTGAATGGCAACCGGGTTTTCGAAAACCAAGGCTTTCCAATCTCCCTAGGCCTTCATGTCTTGAATTCCTAAAG

Cj6OMT, 1041bp

AGTGAAGAAGGACAATCTCTCATCTCAAGCTAAACTGTGGAACTTCATTTATGGTTTTGCTGAATCACTAGTCCTCAAATGTGTAGTGCAACTTGATC  
TAGCCAACATAATTCACAACAGTGGCACGTCCATGACTCTTCCGAGTTATCTTCGCGTCTTCCAAGTCAACCTGTCAATGAAGACGCCTTGTATCGA  
GTCATGCGTTACTTGGTTCACATGAAGCTATTCACAAAAGCATCAATAGATGGAGAATAAGATATGGACTTGCACCACCAGCTAAGTATCTTGTTA  
AAGTTGGGATAAATGTATGGTTGGCTCAATTTTAGCAATCACTGATAAAGATTTTATGGCACCATGGCATTACCTTAAGGATGGATTATCAGGCGA  
AAGTGGTACAGCGTTTGAAGAAGCCTTGGGGACGAATATATGGGGGTACATGGCAGAGCACCTGAGAAAAACCAGCTATTTAATGAAGCAATGGC  
TAATGATTCAAGGCTTATTATGTCTGCATTGGTGAAAGAATGTGGAAATATTTTAAATGGTATAACTACACTTGTGGATGTTGGTGGTGGTACTGGAA  
CTGCTGTGAGGAATATTGCCAATGCATTTCCACATATAAAGTGTACTGTTTATGATCTTCCTCATGTCATTGCTGATTCTCCTGGGACTCCGAAGTTC  
ATTGCGTGGCAGGTGATATGTTCAAGTTCATACCAAAGGCTGATGCTATCATGATGAAGTGCATCCTTCACGACTGGGATGACAAAGAATGCATTGA  
AATTCTAAAGCGATGCAAGGAGGCAGTACCAGTCAAAGGCGGGAAAGTGATTATAGTCGACATTGTCTTAAATGTGCAATCAGAACATCCTTATAC  
CAAGATGAGACTGACTTTGGATTTGGACATGATGCTCAACACTGGAGGAAAAGAGAGGACTGAAGAGGAATGGAAGAAGCTCATCCATGATGCAG

GGTACAAAGGGCATAAGATAACACAAATTACTGCTGTACAATCTGTGATTGAGGCTTATCCATATTAGAT

Cj4'OMT, 1053bp

ATGTCTTTCCATGGGAAAGATGATGTTCTGGACATCAAAGCTCAAGCTCATGTGTGGAAAATCATCTATGGTTTTGCAGATTCCCTAGTCCTCCGATG  
TGCAGTGGAACCTTGAATCGTCGACATCATTGATAACAACAACCAACCCATGGCACTTGCCGATCTGGCATCTAAGCTTCCTGTTCCGATGTGAATT  
GCGATAATTTGTATCGGATATTACGATACTTGGTGAAAATGGAAATACTGAGAGTGGAAAATCTGATGATGGTCAGAAGAAGTACGCGCTTGAAC  
CTATTGCAACATTGCTTTCAAGGAATGCGAAGAGGAGTATGGTTCCAATGATTCTTGGAAATGACTCAAAAAGATTTTATGACTCCTTGGCATTCAATG  
AAGGATGGCTTAAGTGACAATGGTACTGCTTTTGAGAAGGCCATGGGAATGACTATATGGGAGTACTTGGAAAGGACACCCTGATCAAAGCCAATTA  
TTCAATGAAGGCATGGCCGGTGAAACAAGGCTTCTCACTTCTCACTCATATCTGGAAGTAGAGATATGTTTCAAGGTATTGACTCACTTGTGACGT  
CGGTGGAGGAAAATGGTACTACTGTCAAGGCCATTTCTGACGCATTTCCACATATCAAGTGCACCCTCTTTGATCTCCCTCATGTCATTGCCAATTCCT  
ATGACCTTCTAATATTGAACGAATTGGTGGCGACATGTTTAAATCCGTGCCCAGTGCCCAAGCTATCATACTCAAGCTAATTTTGCACGATTGGAAT  
GACGAAGACTCGATCAAGATTTTAAAGCAATGCAGAAATGCAGTGCCAAAAGATGGAGGAAAAGTGATTATAGTGGATGTGGCATTAGATGAGGA  
GTCAGACCATGAGCTTAGCAGCACACGATTGATCCTTGATATCGATATGTTGGTGAACACTGGTGGTAAAGAGCGGACTAAAGAGGTTTGGGAGAA  
AATTGTGAAAAGTGCAGGATTTAGTGGTTGCAAAAATCAGGCACATAGCGGCTATAACAATCAGTCATTGAGGTTTTTCCATAG

CjCNMT, 1077bp

ATGGCTGTGGAAGCAAAGCAAACAAGAAAGCAGCTATAGTAGAGTTGTTAAAACAGTTGGAGCTGGGCTTGGTTCCATATGATGATATTAAGCAG  
CTCATAGGGAGGGAAGTGGCAAGGCGCCTGCAATGGGGTTATAAACCTACTTATGAAGAACAATAGCTGAAATCCAAAACCTTAATCATTCTCTGC  
GACAAATGAAAATTGCAACAGAGGTTGAGACCTTGGATTCACAATTGTACGAGATTCTATTGAGTTTCTAAAGATTATGAATGGAAGTAACTTAAA  
AGGAAGTTGTTGCTACTTCAAAGAAGATTCACAACATTAGATGAAGCTGAGATAGCGATGCTGGATTTATACTGCGAGAGAGCTCAAATCCAAGA  
TGGACAGAGTGTCTTGATCTTGGATGTGGGCAAGGAGCTTTACATTACATGTTGCACAGAAATATAAAAACCTGTCGCGTAACAGCAGTAACAAAT  
TCAGTTTCACAAAAGAGTACATTGAAGAAGAATCAAGGAGACGTAATTTGTTGAATGTGGAAGTCAAATTGGCAGACATAACCACACATGAGATG  
GCTGAGACATACGATCGTATTTTGGTAATAGAGTTGTTTGGACACATGAAGAACTATGAACTTCTCCTGAGGAAAATCTCAGAGTGGATATCGAAAG  
ATGGGCTTCTCTTTCTAGAGCACATATGCCACAAGACCTTTGCTTACCACTATGAGCCTCTAGACGACGACGATTGGTTTACAGAGTACGTGTTTCCT  
GCTGGGACTATGATCATAACCATCTGCATCGTCTTTTTGTATTTCCAGGATGACGTTTCGGTTGTGAACCATTGGACTCTTAGTGGGAAGCACTTTTCG  
CGTACCAATGAGGAATGGTTGAAGAGATTGGACGCAAACCTTGATGTTATTAACCAATGTTTGGAGACTTTAATGGGAAATGAGGAAGAGGCAGTG

AAGTTGATTA ACTATTGGAGAGGATTTTGT TTTATCTGGAATGGAAATGTTTGGATATAACAATGGTGAAGAATGGATGGCAAGTCATGTTCTGTTCAAGAAAAATGA

EcBBE 1545bp, After codon optimization

GGTAATGATTTGTTGTCTTGT TTTGACTTTCAACGGTGT TAGAAACCATACTGTTTTTAGTGCTGATTCTGATTCTGATTTC AATAGATTCTTGCATTTGTCTATCCAAAACCCATTGTTCCAAA ACTCTTTGATTTCTAAACCATCTGCTATTATCTTGCCAGGTTCTAAAGAAGAATTGTCTAACACTATTAGATGCATTAGAAAAGGGTCTTGGACTATTAGATTGAGATCCGGTGGTCATTCTTATGAAGGTTTGTCTTATACTTCTGATACTCCATT CATTGATCGATTTGATGAACCTTGAACAGAGTTTCTATTGATTTGGAATCTGAAACTGCTTGGGTTGAATCTGGTCTACTTTGGGTGAATTGTACTATGCTATTACTGAATCTCTTCTAAGTTGGGTTTTACTGCTGGTTGGTGTCCA ACTGTTGGTACTGGTGGTCATATTTCTGGTGGTGGTTTTGGTATGATGTCTAGAAAAGTATGGTTGGCTGCTGATAATGTTGTTGATGCTATTTTGATTGACGCTAATGGTGTCTATTTGGATAGACAAGCTATGGGTGAAGATGTTTTCTGGGCTATTAGAGGTGGTGGTGGGAGTTTGGGGTGTCTATCTATGCTTGGAAAGATTAAGTTGTTGCCTGTTCCAGAAAAGGTTACTGTTTTTAGAGTTACTAAGAACGTTGCTATTGATGAAGCTACTTCTTTGTTGCATAAATGGCAATTTGTTGCTGAAGAATTGGAAGAAGATTTTACTTTGTCTGTTTTGGGTGGTGCTGATGAAAAACAAGTTTGGTTGACTATGTTGGGTTTTCA TTTTGGTTTGAAGACTGTTGCTAAGTCTACTTTTGATTTGTTGTTTCCTGAATTGGGTTTGGTTGAAGAAGATTACTTGGAAATGTCTTGGGGTGAATCTTTTGCTTACTTGGCTGGTTTGGAACTGTTTCTCAATTGAACAACAGATTTTTGAAGTTCGATGAAAGAGCTTTTAAAGACTAAGGTTGATTTGACTAAAGAGCCTTTGCCATCTAAGGCTTTTTATGGTTTGTGGAAAGATTGTCTAAGGAACCTAATGGTTTTATTGCTTTGAATGGTTTCGGTGGTCAAATGTCTAAGATTTCTTCTGATTTCACTCCATTCCCTCATAGATCCGGTACTAGATTGATGGTTGAATA TATTGTTGCTTGGAAATCAATCTGAACAAAAGAAAAAGACTGAGTTTTTGGATTGGTTGGAAAAGGTTTATGAGTTTATGAAGCCTTTTGT TTTCTAAGAACCCAAGATTGGGTTACGTTAACCATATTGATTTGGATTTGGGTGGTATTGATTGGGGTAACAAGACTGTTGTTAATAACGCTATTGAAATCTCTAGATCCTGGGGTGAATCCTACTTTTTGTCTAATTACGAAAGATTGATCAGAGCTAAGACTTTGATTGATCCAACAATGTTTTCAACCATCCACAATCTATTCCTCCAATGGCTAACTTCGATTATTTGGAAAAGACTTTGGGTTCTGATGGTGGTGAAGTTGTTATT

M1MAO 1332bp, After codon optimization

ATGAGCAATCCGCATGTGGTTATTGTGGGCGCAGGCTTTGCCGGTCTGGTGGCCGCTCGTGA ACTGCAGATGGCCGGTGTGGATGTGGAAATTGTGG AAGCACGCGATCGTGTGGTGGTCGCGCATGGACCGAAGAACGTATGGGCCGCCCGCTGGA ACTGGGTGCCACCTGGGTGCATTGGATGCAGCCGCATGTGTGGAGCGAAATTACCCGCTATGATCAGAGCATCTATCCGAGCCCGTTTTGTGATGATGCCTATTGGATTACCGGTGGTCTGTGTTGAACATGGTACAGAAGCAGATTTGGATGCAGCACTGGCCCGTCCGATGGCCAAAATTTTTGAAGATAGTCGTGAATTTTTCCCGTATCCGATGAACCGCTGCATGTTCTGGATGAAAGCAGTGGCAGCACCCCGAACTGCGTGAACGCTTTTCGTGCAGCAGATCAGGGTAGCGTTCTGGATTGTCTGAAAGGTGGCGATTT

TACCCAGGAAGAACGTGATCTGTGTGATGCATATTGGAGTGCAGCCTATATTGGTGACCCGCATCAGGGTAGCCCGCTGATGGCCAAACAGTGGGCC  
GCACTGAGTGATCATCGTCTGAGTCTGGTGGATGAACAGACCCTGCGTTTTAAACTGACCCATGGCATGCGTGGTCTGTATGAAAATATTGCCGCCG  
ATCTGCGTTGCCGATTTCGCCTGAATACCCCGGTGACCGCAGTGGATCATCGTAGCGATGGCGCAACCGTGACCCTGGGCACCGGCGAAAAAATTAG  
TTGCGATAGCGTTATTGTTACCGTGCCGGTGGGTGCACTGCCGACCATTGAGTTTACTCCGGGCTGCCGAGTGGCATGCGTACCGTTATTGATCAGC  
GTTGGAATAGTACCGGCTGCAAAATTTGGGTGAAAGTGAAAGGCCATCATAGCATTCTGGGCTATGCCCCGACCCCGCATAAAGCAGCCGTGTTTCG  
CAGCGAATTTTTCATGGATGATGATACCACCATTTGTGTGGGCTTTGGCAGTCATCATGATGCCGTTGATCTGACCGATCCGCGTGATGCCCAGGCAA  
TTGTGGATCAGTGGCGTCCGGATCTGGAAGTTGTTGATTGCACCGGCCATGATTGGGTTGCCGATCGCTGGAGCGGCCAGGCATGGGCAACCCTGCG  
TAGCGGTCAGTTTACCAATGGCTGGCATCATTTTCGTAGTACCGATAGCCGTCTGCGCTTTCAGGCGCCGATTGGGCACGTGGTTGGCGCGGTGTG  
GTTGTTGATGGTGCCATTGAAACCGGTCTGAGTACCGCCCGTGATGTGCTGCGCGATATTTCGCGCATAA

CjNCS 558bp, After codon optimization

ATGTTTCATCGGCACCATTAATTGTGAACGTCTGATTTTTAAACGGTCGTCCGCTGCTGCATCGCGTGACCAAAGAAGAAACCGTTATGCTGTATCATGA  
ACTGGAAGTGGCAGCCAGTGCAGATGAAGTGTGGAGCGTGGAAGGTAGCCCGGAACTGGGTCTGCATCTGCCGGATCTGCTGCCGGCAGGTATTTT  
TGCAAAATTTGAAATTACCGGCGATGGTGGTGAAGGTAGTATTCTGGATATGACCTTTCGCCCGGGTCAGTTTCCGCATCATTATCGTGAAAAATTTG  
TTTTCTTTGACCACAAAACCGCTATAAACTGGTGGAAACAGATTGATGGCGATTTCTTTGATCTGGGCGTGACCTATTATATGGATAACCATTCTGTGT  
GTTGCCACCGGTCCGGATAGCTGTGTGATTAAGAGTACCACCGAATATCATGTGAAACCGGAATTTGCCAAAATTGTTAAACCGCTGATTGATACCG  
TGCCGCTGGCAATTATGAGCGAAGCAATTGCAAAAAGTTGTTCTGAAAAATAAGCATAAAAAGCAGTGAATAA
